# Supplementary material
Source: publisher figshare collection journal article supplement (https://acs.figshare.com/ndownloader/files/5309890)
Supplement: Supplementary file 1 [file 5309890]

# **Clusters Evolution at Early Stages of 1,3,5-Triamino-2,4,6-trinitrobenzene under Various Heating Conditions: A Molecular Reactive Force Field Study**

**Yushi Wen, XiangguiXue, Xinpeng Long, and Chaoyang Zhang\***

*Institute of Chemical Materials, China Academy of Engineering Physics (CAEP), P. O. Box 919-311, Mianyang, Sichuan 621900, China.*

## **Supporting Information**

### **Table of Contents**

S1 The detailed information of the supercells.

S2 Bond order minimum values used to determine molecules and the products of heated TATB.

S3 The products of TATB heated under various conditions.

S4 Primary reactions under various heating conditions.

## S1. The detailed information of the supercells

Table s1. The detailed information of the supercells.

| supercells                        | TATB     |         |          |
|-----------------------------------|----------|---------|----------|
| enlargement times from unit cells | 6×6×6    |         |          |
| Lattice Parameters                | a        | b       | c        |
|                                   | 54.06 Å  | 54.17 Å | 40.87 Å  |
|                                   | $\alpha$ | $\beta$ | $\gamma$ |
|                                   | 108.58°  | 119.97° | 91.82°   |
| Amounts of molecules              | 432      |         |          |
| Amounts of atoms                  | 10368    |         |          |

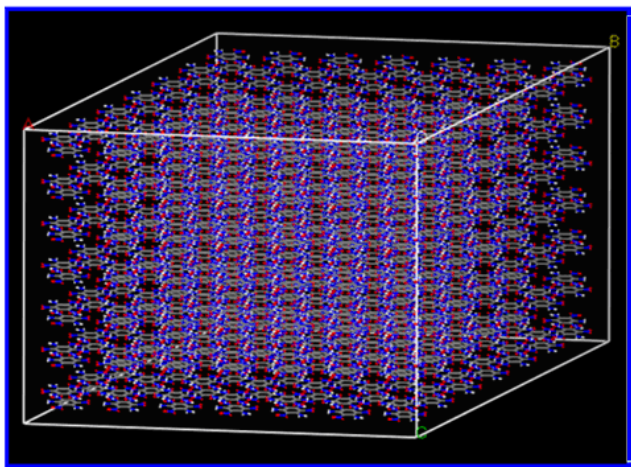

Fig. s1 Supercells of TATB. The carbon, hydrogen, oxygen and nitrogen atoms are indicated in grey, white, red and blue, respectively.

## S2. List of bond order minimum values used to determine molecules

Table s2. List of bond order minimum values used to determine molecules.

| Atom type | Atom type | Bond order |
|-----------|-----------|------------|
| C         | N         | 0.3        |
| C         | C         | 0.55       |
| C         | O         | 0.65       |
| C         | H         | 0.4        |
| O         | O         | 0.65       |
| N         | O         | 0.4        |
| O         | H         | 0.4        |
| H         | H         | 0.55       |
| H         | N         | 0.55       |
| N         | N         | 0.55       |

### S3. The products of TATB heated under various conditions.

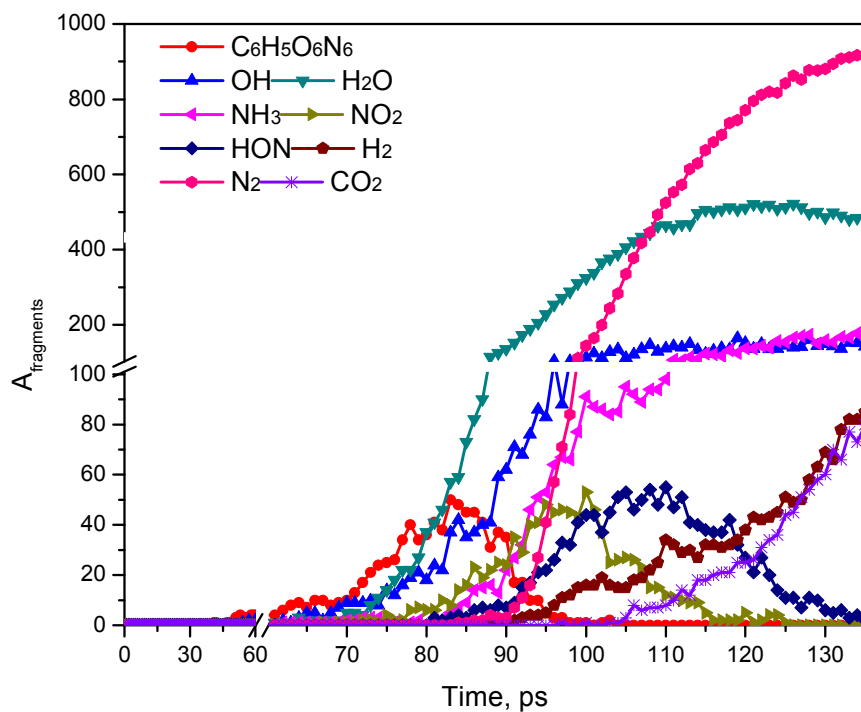

Fig. S2 The products of TATB programmed heated at a rate of 20 K/ps.

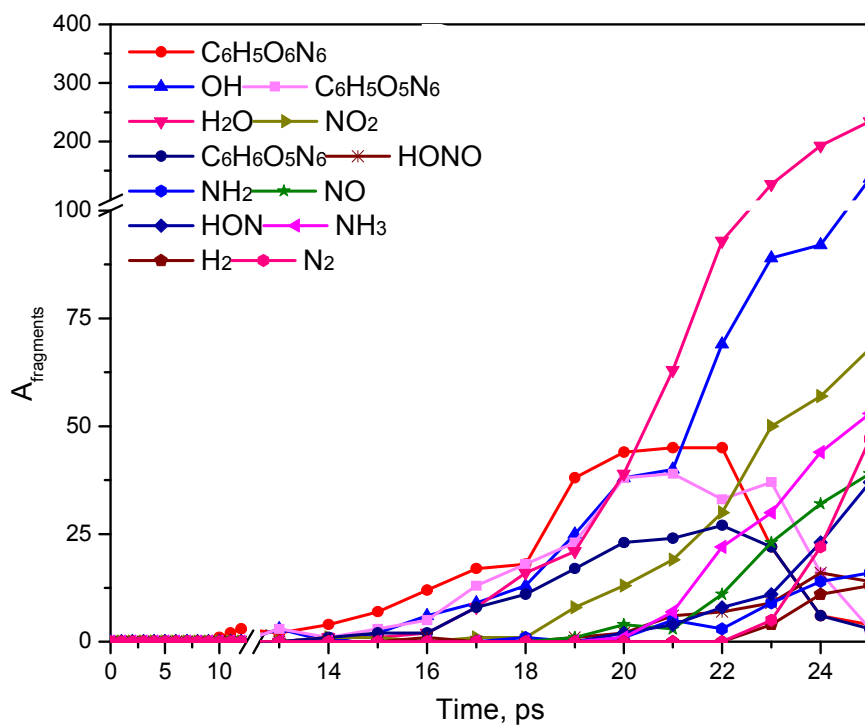

Fig. S3 The products of TATB programmed heated at a rate of 100 K/ps.

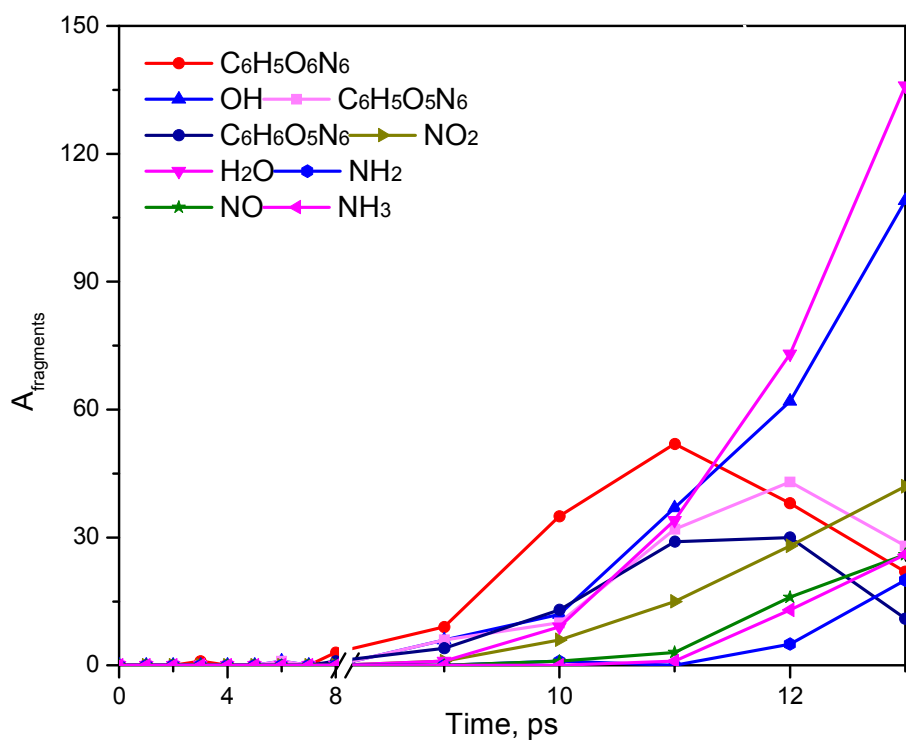

Fig. s4 The products of TATB programmed heated at a rate of 200 K/ps.

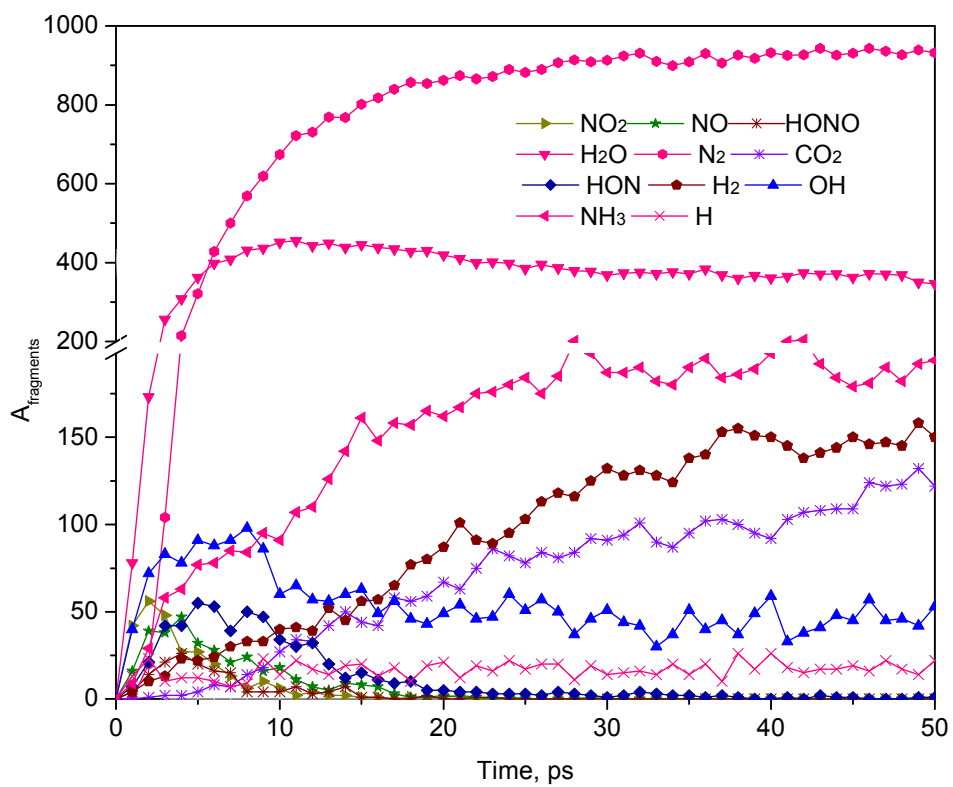

Fig. s5 The products of TATB heated at 3000 K.

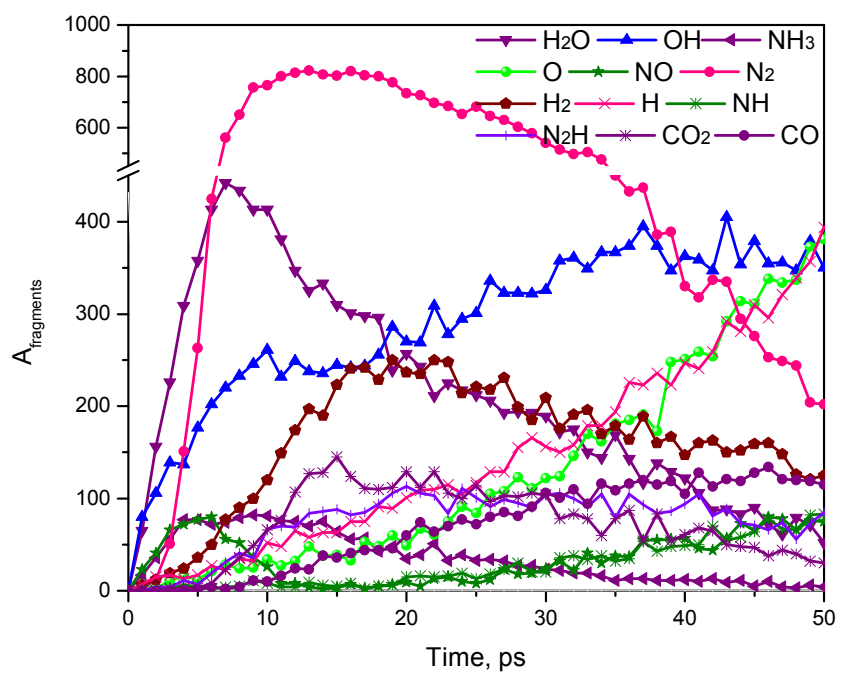

Fig. s6 The products of TATB adiabatic heated from 3000 K.

#### S4 Primary reactions under various heating conditions.

Table s3. Primary reactions and their frequencies under programmed heating with rate of 20 K/ps (time of statistics is 0~135ps with an interval of 1ps).

| Frequency | Reactants                                                                             | Products                                                                                                               |
|-----------|---------------------------------------------------------------------------------------|------------------------------------------------------------------------------------------------------------------------|
| 31        | $\text{C}_6\text{H}_6\text{O}_6\text{N}_6 + \text{C}_6\text{H}_6\text{O}_6\text{N}_6$ | $\Rightarrow \text{C}_6\text{H}_5\text{O}_6\text{N}_6 + \text{C}_6\text{H}_7\text{O}_6\text{N}_6$                      |
| 28        | $\text{C}_6\text{H}_6\text{O}_6\text{N}_6$                                            | $\Rightarrow \text{C}_6\text{H}_5\text{O}_5\text{N}_6 + \text{HO}$                                                     |
| 14        | $\text{C}_6\text{H}_7\text{O}_6\text{N}_6$                                            | $\Rightarrow \text{C}_6\text{H}_6\text{O}_5\text{N}_6 + \text{HO}$                                                     |
| 10        | $\text{C}_6\text{H}_6\text{O}_6\text{N}_6 + \text{HO}$                                | $\Rightarrow \text{C}_6\text{H}_5\text{O}_6\text{N}_6 + \text{H}_2\text{O}$                                            |
| 10        | $\text{C}_6\text{H}_6\text{O}_6\text{N}_6 + \text{C}_6\text{H}_6\text{O}_6\text{N}_6$ | $\Rightarrow \text{C}_6\text{H}_5\text{O}_5\text{N}_6 + \text{C}_6\text{H}_5\text{O}_6\text{N}_6 + \text{H}_2\text{O}$ |
| 9         | $\text{C}_6\text{H}_6\text{O}_6\text{N}_6$                                            | $\Rightarrow \text{C}_6\text{H}_4\text{O}_5\text{N}_6 + \text{H}_2\text{O}$                                            |
| 9         | $\text{C}_6\text{H}_6\text{O}_6\text{N}_6 + \text{HO}$                                | $\Rightarrow \text{C}_6\text{H}_7\text{O}_7\text{N}_6$                                                                 |
| 9         | $\text{C}_6\text{H}_7\text{O}_6\text{N}_6$                                            | $\Rightarrow \text{C}_6\text{H}_5\text{O}_5\text{N}_6 + \text{H}_2\text{O}$                                            |
| 9         | $\text{H}_2\text{N}_2$                                                                | $\Rightarrow \text{H}_2 + \text{N}_2$                                                                                  |
| 8         | $\text{H}_2\text{N} + \text{H}_2\text{O}$                                             | $\Rightarrow \text{H}_3\text{N} + \text{HO}$                                                                           |
| 8         | $\text{C}_6\text{H}_6\text{O}_6\text{N}_6 + \text{C}_6\text{H}_6\text{O}_6\text{N}_6$ | $\Rightarrow \text{C}_6\text{H}_6\text{O}_5\text{N}_6 + \text{C}_6\text{H}_6\text{O}_7\text{N}_6$                      |
| 8         | $\text{HO} + \text{HO}$                                                               | $\Rightarrow \text{H}_2\text{O}_2$                                                                                     |
| 6         | $\text{H} + \text{HO}$                                                                | $\Rightarrow \text{H}_2\text{O}$                                                                                       |
| 6         | $\text{C}_6\text{H}_6\text{O}_6\text{N}_6 + \text{C}_6\text{H}_6\text{O}_6\text{N}_6$ | $\Rightarrow \text{C}_6\text{H}_5\text{O}_6\text{N}_6 + \text{C}_6\text{H}_6\text{O}_5\text{N}_6 + \text{HO}$          |
| 5         | $\text{HO}_3\text{N}$                                                                 | $\Rightarrow \text{HO} + \text{NO}_2$                                                                                  |

**Table s4.** Primary reactions and their frequencies under programmed heating with rate of 100 K/ps (time of statistics is 0~27 ps with an interval of 1 ps)

| Frequency | Reactants                     | Products                                         |
|-----------|-------------------------------|--------------------------------------------------|
| 28        | $C_6H_6O_6N_6$                | $\Rightarrow C_6H_5O_5N_6 + HO$                  |
| 17        | $C_6H_6O_6N_6 + C_6H_6O_6N_6$ | $\Rightarrow C_6H_5O_6N_6 + C_6H_7O_6N_6$        |
| 7         | $C_6H_6O_6N_6 + C_6H_6O_6N_6$ | $\Rightarrow C_6H_5O_5N_6 + C_6H_5O_6N_6 + H_2O$ |
| 7         | $C_6H_6O_6N_6 + C_6H_6O_6N_6$ | $\Rightarrow C_6H_6O_5N_6 + C_6H_6O_7N_6$        |
| 6         | $C_6H_6O_6N_6 + HO$           | $\Rightarrow C_6H_5O_6N_6 + H_2O$                |
| 5         | $C_6H_6O_6N_6 + C_6H_6O_6N_6$ | $\Rightarrow C_6H_5O_5N_6 + C_6H_7O_7N_6$        |
| 5         | $C_6H_6O_6N_6$                | $\Rightarrow C_6H_5O_6N_6 + H$                   |
| 5         | $C_6H_7O_7N_6$                | $\Rightarrow C_6H_6O_6N_6 + HO$                  |
| 5         | $C_6H_7O_6N_6$                | $\Rightarrow C_6H_6O_5N_6 + HO$                  |
| 4         | $C_6H_6O_6N_6$                | $\Rightarrow C_6H_6O_4N_5 + NO_2$                |
| 4         | $C_6H_6O_6N_6$                | $\Rightarrow C_6H_4O_5N_6 + H_2O$                |
| 4         | $C_6H_6O_6N_6 + C_6H_6O_6N_6$ | $\Rightarrow C_{12}H_{12}O_{12}N_{12}$           |
| 4         | $C_6H_6O_7N_6$                | $\Rightarrow C_6H_6O_5N_5 + NO_2$                |
| 4         | $C_6H_5O_5N_6 + C_6H_6O_6N_6$ | $\Rightarrow C_6H_5O_6N_6 + C_6H_6O_5N_6$        |
| 4         | $C_6H_6O_6N_6 + C_6H_6O_6N_6$ | $\Rightarrow C_6H_5O_6N_6 + C_6H_6O_5N_6 + HO$   |



**Table s5.** Primary reactions and their frequencies under programmed heating with rate of 200 K/ps (time of statistics is 0~13.5ps with an interval of 1ps)

| Frequency | Reactants                     | Products                                                 |
|-----------|-------------------------------|----------------------------------------------------------|
| 29        | $C_6H_6O_6N_6$                | $\Rightarrow C_6H_5O_5N_6 + HO$                          |
| 21        | $C_6H_6O_6N_6 + C_6H_6O_6N_6$ | $\Rightarrow C_6H_5O_6N_6 + C_6H_7O_6N_6$                |
| 9         | $C_6H_6O_6N_6$                | $\Rightarrow C_6H_6O_4N_5 + NO_2$                        |
| 8         | $C_6H_6O_6N_6 + C_6H_6O_6N_6$ | $\Rightarrow C_6H_5O_5N_6 + C_6H_5O_6N_6 + H_2O$         |
| 8         | $C_6H_6O_6N_6$                | $\Rightarrow C_6H_5O_6N_6 + H$                           |
| 8         | $C_6H_6O_6N_6 + C_6H_6O_6N_6$ | $\Rightarrow C_6H_5O_6N_6 + C_6H_6O_5N_6 + HO$           |
| 7         | $C_6H_6O_6N_6 + C_6H_6O_6N_6$ | $\Rightarrow C_6H_6O_5N_6 + C_6H_6O_7N_6$                |
| 5         | $C_6H_6O_6N_6 + C_6H_6O_6N_6$ | $\Rightarrow C_{12}H_{12}O_{12}N_{12}$                   |
| 3         | $C_6H_7O_6N_6$                | $\Rightarrow C_6H_5O_5N_6 + H_2O$                        |
| 3         | $C_6H_6O_6N_6 + C_6H_7O_6N_6$ | $\Rightarrow C_6H_5O_6N_6 + C_6H_6O_5N_6 + H_2O$         |
| 3         | $3C_6H_6O_6N_6$               | $\Rightarrow C_6H_5O_6N_6 + C_6H_6O_5N_6 + C_6H_7O_7N_6$ |
| 2         | $C_6H_6O_6N_6 + HO$           | $\Rightarrow C_6H_4O_7N_5 + NH_3$                        |
| 2         | $C_6H_5O_5N_6 + C_6H_6O_6N_6$ | $\Rightarrow C_6H_5O_4N_6 + C_6H_5O_6N_6 + HO$           |
| 2         | $C_6H_6O_6N_6 + C_6H_6O_6N_6$ | $\Rightarrow C_6H_6O_5N_5 + C_6H_6O_5N_6 + NO_2$         |
| 2         | $C_6H_5O_6N_6 + H$            | $\Rightarrow C_6H_5O_5N_6 + HO$                          |

**Table s6.** Primary reactions and their frequencies under constant temperature heating (T=3000 K and the time of statistics is 0~5ps with an interval of 0.1ps)

| Frequency | Reactants                   |    | Products                         |
|-----------|-----------------------------|----|----------------------------------|
| 22        | $C_6H_6O_6N_6$              | => | $C_6H_6O_4N_5+NO_2$              |
| 21        | $C_6H_6O_6N_6+C_6H_6O_6N_6$ | => | $C_6H_5O_6N_6+C_6H_7O_6N_6$      |
| 18        | $C_6H_6O_6N_6$              | => | $C_6H_5O_5N_6+HO$                |
| 15        | $C_6H_6O_6N_6$              | => | $C_6H_5O_6N_6+H$                 |
| 8         | $C_6H_6O_6N_6$              | => | $C_6H_6O_5N_6+O$                 |
| 6         | $C_6H_6O_6N_6$              | => | $C_6H_4O_6N_5+H_2N$              |
| 6         | $C_6H_6O_6N_6+C_6H_6O_6N_6$ | => | $C_6H_5O_5N_6+C_6H_5O_6N_6+H_2O$ |
| 5         | $C_6H_6O_6N_6+C_6H_6O_6N_6$ | => | $C_{12}H_{12}O_{12}N_{12}$       |
| 5         | $C_6H_6O_6N_6+C_6H_6O_6N_6$ | => | $C_6H_6O_5N_6+C_6H_6O_7N_6$      |
| 5         | $C_6H_6O_6N_6+C_6H_6O_6N_6$ | => | $C_6H_5O_6N_6+C_6H_6O_5N_6+HO$   |
| 5         | $C_6H_6O_6N_6+O$            | => | $C_6H_6O_7N_6$                   |
| 5         | $C_6H_6O_6N_6+HO$           | => | $C_6H_5O_6N_6+H_2O$              |
| 4         | $C_6H_7O_6N_6$              | => | $C_6H_4O_6N_5+NH_3$              |
| 4         | $C_6H_5O_6N_6$              | => | $C_6H_4O_5N_6+HO$                |
| 4         | $C_6H_6O_6N_6+H$            | => | $C_6H_6O_5N_6+HO$                |

**Table s7.** Primary reactions and their frequencies under adiabatic heating with preheating at 3000 K for 0.5 ps (the time of statistics is 0~5ps with an interval of 0.1ps)

| Frequency | Reactants                   |    | Products                    |
|-----------|-----------------------------|----|-----------------------------|
| 33        | $C_6H_6O_6N_6$              | => | $C_6H_5O_5N_6+HO$           |
| 16        | $C_6H_6O_6N_6$              | => | $C_6H_6O_4N_5+NO_2$         |
| 13        | $C_6H_6O_6N_6+HO$           | => | $C_6H_7O_7N_6$              |
| 11        | $C_6H_7O_6N_6$              | => | $C_6H_6O_5N_6+HO$           |
| 11        | $C_6H_6O_6N_6+C_6H_6O_6N_6$ | => | $C_6H_5O_6N_6+C_6H_7O_6N_6$ |
| 8         | $C_6H_5O_5N_6$              | => | $C_6H_4O_4N_6+HO$           |
| 6         | $C_6H_5O_6N_6+HO$           | => | $C_6H_4O_6N_6+H_2O$         |
| 6         | $C_6H_5O_6N_6+C_6H_6O_6N_6$ | => | $C_{12}H_{11}O_{12}N_{12}$  |
| 6         | $C_6H_6O_6N_6+H$            | => | $C_6H_7O_6N_6$              |
| 5         | $C_6H_6O_7N_6$              | => | $C_6H_6O_5N_5+NO_2$         |
| 5         | $C_6H_7O_6N_6$              | => | $C_6H_5O_5N_6+H_2O$         |
| 5         | $C_6H_6O_5N_6$              | => | $C_6H_5O_4N_6+HO$           |
| 5         | $C_6H_5O_5N_6$              | => | $C_6H_5O_3N_5+NO_2$         |
| 5         | $C_6H_4O_4N_4$              | => | $C_6H_3O_3N_4+HO$           |
| 5         | $O_2N$                      | => | $O+NO$                      |
